# Supplementary material for: Atomic layer deposition of sodium and potassium oxides: evaluation of precursors and deposition of thin films
Source: Royal Society of Chemistry journal article supplement (doi:10.1039/c4dt01930j), 2014-01-01
Supplement: c4dt01930j1.pdf [file c4dt01930j1.pdf]

## Supplementary information

The table below reports the crystallographic data of the structure of NaO<sup>t</sup>Bu, as reported to CCDC with #1017545.

|                                   |                                                           |                                                        |
|-----------------------------------|-----------------------------------------------------------|--------------------------------------------------------|
| Chemical formula                  | [C <sub>4</sub> H <sub>9</sub> NaO] <sub>6</sub>          |                                                        |
| Formula weight                    | 576.61                                                    |                                                        |
| Temperature                       | 100(2) K                                                  |                                                        |
| Range for data collection         | 2.2 to 20.8° 2 $\theta$                                   |                                                        |
| Wavelength                        | 0.71073 Å (Mo K $\alpha$ )                                |                                                        |
| Crystal system                    | orthorhombic                                              |                                                        |
| Space group                       | P2 <sub>1</sub> 2 <sub>1</sub> 2 <sub>1</sub>             |                                                        |
| Unit cell dimensions              | a = 18.1583(16) Å<br>b = 19.2347(17) Å<br>c = 51.548(4) Å | $\alpha$ = 90°<br>$\beta$ = 90°<br>$\gamma$ = 90°      |
| Volume                            | 18004(3) Å <sup>3</sup>                                   |                                                        |
| F(000)                            |                                                           | 6240.00                                                |
| Reflections collected             |                                                           | 90802                                                  |
| Independent reflections           |                                                           | 18808 [R(int) = 0.069]                                 |
| Goodness-of-fit on F <sup>2</sup> |                                                           | 1.06                                                   |
| $\Delta/\sigma_{\max}$            |                                                           | < 0.001                                                |
| Final R indices                   | 14462 data; I>2 $\sigma$ (I)<br>all data                  | R1 = 0.0580, wR2 = 0.1414<br>R1 = 0.0846, wR2 = 0.1565 |
| Reflections/parameters/restraints |                                                           | 18080/1711/36                                          |
